1 **Comprehensive single-PCR 16S and 18S rRNA community analysis validated with**  
2 **mock communities and denoising algorithms**

3 Yi-Chun Yeh<sup>1</sup>, Jesse C. McNichol<sup>1</sup>, David M. Needham<sup>1,2</sup>, Erin B. Fichot<sup>1</sup>, and Jed A.  
4 Fuhrman<sup>1</sup>

5 <sup>1</sup>Department of Biological Sciences, University of Southern California, Los Angeles,  
6 California 90089-0371, USA

7 <sup>2</sup>Current address: GEOMAR Helmholtz Centre for Ocean Research, Kiel, Germany, 24148

8

9 Correspondence:

10 Yi-Chun Yeh

11 Department of Biological Sciences, University of Southern California, Los Angeles,

12 California 90089-0371, USA

13 Email: yichuny@usc.edu

## 14 **Abstract**

15           Universal SSU rRNA primers allow comprehensive quantitative profiling of  
16 natural communities by simultaneously amplifying templates from Bacteria, Archaea,  
17 and Eukaryota in a single PCR reaction. Despite the potential to show all rRNA gene  
18 relative gene abundances, they are rarely used due to concerns about length bias  
19 against 18S amplicons and bioinformatic challenges converting mixed 16S/18S  
20 sequences into amplicon sequence variants. We thus developed 16S and 18S rRNA  
21 mock communities and a bioinformatic pipeline to validate this three-domain approach.  
22 To test for length biases, we mixed eukaryotic and prokaryotic mocks before PCR, and  
23 found consistent two-fold underestimation of longer 18S sequences due to sequencing  
24 but not PCR bias. Using these mocks, we show universal V4-V5 primers (515Y/926R)  
25 outperformed eukaryote-specific V4 primers in observed vs. expected abundance  
26 correlations and sequences with single mismatches to the primer were strongly  
27 underestimated (3-8 fold). A year of monthly time-series data from a protist-enriched  
28 1.2-80  $\mu\text{m}$  size fraction yielded an average of 9% 18S, 17% chloroplast 16S, and 74%  
29 prokaryote 16S rRNA gene amplicons. These data demonstrate the potential for  
30 universal primers to generate quantitative and comprehensive microbiome profiles,  
31 although gene copy and genome size variability should be considered - as for any  
32 quantitative genetic analysis.

33

## 34 **Introduction**

35           Microbial communities of unicellular organisms are dynamic, diverse  
36 communities made up of bacteria, archaea, eukaryotes that interact with one another  
37 and their environment. Studying all these components together is essential for  
38 understand how the ecosystem functions as a whole (Fuhrman et al., 2015; Needham et

39 al., 2018; Chénard et al., 2019), though single components are most typically studied  
40 alone due in part to the perception that separate assays are required for each. Since  
41 high-throughput DNA sequencing was introduced, SSU rRNA sequencing has been  
42 widely used for analyzing microbial community structure - especially for prokaryotes  
43 by targeting the 16S rRNA gene (Sogin et al., 2006). Analyses focusing on eukaryotic  
44 communities with 18S rRNA sequencing, however, are not as common partly because  
45 hypervariable regions are mostly longer than early sequencing lengths (Amaral-Zettler  
46 et al., 2009). Until recently, with current sequencing capacities, two regions, V4 and V7-  
47 9, have become commonly used for planktonic eukaryotic community profiles (Amaral-  
48 Zettler et al., 2009; Stoeck et al., 2010; Balzano et al., 2015; De Vargas et al., 2015). To  
49 study metazoan host-dominated communities, however, a concern is that universal  
50 16S&18S primers would mainly amplify 18S host sequences, overwhelming the 16S and  
51 non-host 18S microbiome, and thus blocking primers or universal non-metazoan  
52 primers are required in these studies (Del Campo et al., 2019).

53         Despite these methodological developments, the question of how well the entire  
54 sequencing and analysis pipeline recovers the true abundance of rRNA genes found in  
55 the natural community has received less attention. In pelagic marine environments,  
56 studies have underscored the importance of careful primer design for accurately  
57 resolving natural communities, e.g. correcting the severe underestimate of the SAR11  
58 clade that occurred with one of the most popular primers (Apprill et al., 2015; Parada et  
59 al., 2016). In addition, validation and inter-comparison of primer performance has also  
60 been facilitated by the development and application of microbial internal standards or  
61 “mock communities” to PCR amplicon analysis (hereafter “mocks”). The application of  
62 mocks to the PCR amplification, sequencing, and analysis protocol has demonstrated  
63 that even well-designed primers (515Y/926R vs. 515Y/806R) differ in terms of their

64 ability to quantitatively recover natural abundance patterns (Parada et al., 2016).  
65 Including mocks in a sequencing run can also verify instrument performance, thus  
66 avoiding improper ecological conclusions. For example, mocks revealed that an  
67 unknown technical issue affecting a single sequencing run inexplicably caused an entire  
68 major taxon to be missing in output data and altered abundances of other taxa (Yeh et  
69 al., 2018). More recently, it has been shown that amplicon methods can be made even  
70 more quantitative by the addition of internal DNA standards (i.e. added to samples  
71 before extraction and purification of DNA). This allows normalization of amplicon data  
72 closer to true abundances found in seawater (except for lysis efficiency variations) and  
73 was found to be consistent with other, extensively-validated methods (Lin et al., 2019).

74         Bioinformatic methods used for amplicon sequence analysis have also evolved  
75 considerably, with initial efforts focusing on how well algorithms resolve true biological  
76 sequences by clustering sequences into operational taxonomic units (OTUs) at a certain  
77 similarity threshold. This effort has culminated in the development of “denoising”  
78 algorithms that are designed to recover true underlying biological sequences to the  
79 individual base (i.e. amplicon sequence variants; ASVs) by endeavoring to eliminate  
80 sequencing and PCR errors (Eren et al., 2015; Callahan et al., 2016; Amir et al., 2017).  
81 Unlike OTU clustering that must analyze sequences all together into often vaguely-  
82 defined or “fuzzy” units that change study-by-study, denoising methods aim to better  
83 account for batch effects across multiple sequencing runs, and are able to analyze  
84 sequences either sample-by-sample (Deblur) or run-by-run (DADA2), which greatly  
85 reduces computational demand (Callahan et al., 2016).

86         Collectively, these studies show how PCR amplicons can generate quantitative  
87 data that allows microbial community composition to be measured alongside other  
88 oceanographic variables. However, choosing an appropriate sequencing strategy

89 remains a significant challenge given the diverse primers and sequencing technologies  
90 currently available. In order to maximize overall utility, it is highly desirable to keep  
91 costs low while generating data with high phylogenetic resolution. Parada et al. (2016)  
92 have previously described a universal primer set (515Y/926R) that simultaneously  
93 amplifies 16S and 18S rRNA in a single PCR reaction. Because of their universal nature,  
94 these primers measure both eukaryotic microbes and prokaryotes and can provide  
95 insights into processes such as predation, parasitism, and mutualism (Needham and  
96 Fuhrman, 2016; Needham et al., 2018).

97         However, analyzing data generated from universal 515Y/926R primer set has  
98 several potential challenges First, mixed 16S and 18S amplicon sequences present  
99 bioinformatic challenges since the two types of amplicons must be analyzed differently.  
100 This is because with current Illumina technology, the forward and reverse reads do not  
101 overlap for the 18S amplicon (575-595 bp), meaning that they cannot be merged as is  
102 typical for 16S amplicon analysis. Second, PCR and sequencing both discriminate  
103 against longer amplicons (Kittelmann et al., 2013), yet we lack a quantitative  
104 understanding of PCR and sequencing biases against longer 18S amplicons. These biases  
105 can potentially be detected via mock community analysis, specifically collections of  
106 known 16S or 18S rRNA gene fragments (Bradley et al., 2016; Parada et al., 2016). Yet to  
107 our knowledge, there have not been tests with mixed mock communities consisting of  
108 both 16S and 18S rRNA genes.

109         In this study, we present results from mock communities designed to validate  
110 the 515Y/926R primer set with particular emphasis on its performance with 18S  
111 sequences in comparison to commonly-used 18S-specific primer sets. We also present a  
112 bioinformatics workflow designed for mixed 16S and 18S amplicons that generates  
113 ASVs differing by as little as a single base, and reproducibly recovers the known exact

114 sequences from the mock communities. This workflow, which uses common tools such  
115 as cutadapt (Martin, 2011), bbtools (<http://sourceforge.net/projects/bbmap/>), DADA2  
116 (Callahan et al., 2016), deblur (Amir et al., 2017) and QIIME 2 (Bolyen et al., 2018),  
117 simplifies sequence analysis for mixed 16S and 18S amplicons, and allowed us to  
118 rigorously test the performance of two different denoisers (DADA2 and deblur) with a  
119 variety of different data types. We also rigorously examined biases between 16S and  
120 18S amplicons at the PCR and sequencing steps. Lastly, we analyzed natural marine  
121 samples collected from San Pedro Ocean Time-series (SPOT) using the same workflow  
122 to examine the application of 515Y/926R to environmental samples.

123

## 124 **Results**

### 125 **Effects of trim length on 18S denoising**

126 Since 18S amplicons amplified with 515Y/926R are too long (~575-595 bp) for  
127 forward and reverse reads to overlap (even with 2 x 300bp sequencing), we decided to  
128 trim reads to fixed lengths before denoising. Trimmed reads are concatenated either  
129 before (q2-dada2 and q2-deblur QIIME 2 plugins) or after denoising (standalone  
130 DADA2 R package). As quality profiles of reverse reads vary widely among runs, a trim  
131 length which worked equally well across runs needed to be determined. We therefore  
132 systematically decreased the trim length of reverse reads from 220 to 100 bp while  
133 fixing trim length of forward reads at 220 bp. Three criteria were then used to compare  
134 denoiser performance; 1) percent reads that perfectly matched *in silico* sequences, 2) R-  
135 squared values obtained by plotting the expected abundance of staggered mock  
136 community against the sequenced staggered mock community on a log (x+0.001) scale,  
137 and 3) percent reads removed after denoising (Table 1). Deblur successfully recovered  
138 staggered mock communities in the proportions expected regardless which trim length

139 was chosen, and we did not observe any sequences without an exact match to the  
140 known reference sequences. DADA2, however, produced up to 0.5 % of reads that did  
141 not perfectly match the mock communities, though it performed slightly better when  
142 concatenating reads after denoising (0.3 % of reads did not perfectly match *in silico*  
143 sequences). By blasting these reads against *in silico* sequences, we found that these  
144 reads could be accounted for by sample bleed-through or contamination as they had  
145 more than 1-mismatch to the *in silico* sequences, which were less likely produced by  
146 PCR/sequencing errors. Although deblur never produced such putative erroneous ASVs,  
147 it removed a large fraction of reads (~75%) compared with DADA2 (~25%), yielding  
148 fewer observations in the final ASV table (Table 1). According to the three criteria  
149 defined above, denoiser performance was relatively consistent among runs at a trim  
150 length for the reverse read of 200 bp. Therefore, this length was used for the rest of the  
151 analysis.

152

### 153 **Comparison of 16S and 18S universal primers (515Y/926R) and eukaryote-** 154 **specific primers (V4F/V4R and V4F/V4RB) with 18S mock communities**

155 Our 18S mock communities are mixtures of a number of nearly full-length 18S  
156 rRNA genes with known concentrations, and were designed to represent the major  
157 eukaryotic groups found in marine environments, including Haptophyta, Dinophyta,  
158 Ochrophyta, Ciliophora, Cercozoa, Radiolaria, and Metazoa. Among them, Prymnesiales  
159 (Haptophyta) has a single mismatch to the reverse primer V4R (at the 3' end), and three  
160 Dinophyta species (Lingulodinium, Dino-Group-II\_b, and Gymnodinium) have a single  
161 mismatch to the reverse primer 926R. As the abundances of taxa in mock communities  
162 are known *a priori*, they can be used to test which primer set and denoising algorithm  
163 recover the community composition most closely to what is expected (Fig. 2).

164 For 18S even mock communities, V4F/V4R underestimated Prymnesiales  
165 (Haptophyta) by ~4-fold, presumably because of a single nucleotide mismatch on the 3'  
166 end of the reverse primers (Fig. 2a) (Stoeck et al., 2010). On the other hand, the  
167 V4F/V4RB primers that do not have any mismatches overestimated Prymnesiales  
168 (Haptophyta) by ~4-fold (Fig. 2b) (Balzano et al., 2015) while the 515Y/926R primers  
169 produced a community composition similar to that expected (Fig. 2c). The patterns  
170 were consistent among denoising pipelines (Fig. 2).

171 For 18S staggered mock communities, similar results were found. V4F/V4R  
172 underestimated Prymnesiales (Haptophyta) by ~5-fold (Fig. 3a), and V4F/V4RB  
173 overestimated Prymnesiales (Haptophyta) by ~3-fold (Fig. 3b). 515Y/926R  
174 underestimated three Dinophyta species (with single primer mismatches) to varying  
175 degrees (Lingulodinium, ~8-fold; Dino-Group-II\_b, ~3-fold; Gymnodinium, ~4-fold)  
176 (Fig. 3c). However, there was no relationship between degree of underestimation and  
177 locations of primer mismatch (Lingulodinium, -11 bases from the 3' end; Dino-Group-  
178 II\_b, -12 bases from the 3' end; Gymnodinium, -2 bases from the 3' end). The patterns  
179 were consistent among denoising pipelines (Fig. 3). Overall, the observed mock  
180 community composition was more similar to the expected with 515Y/926R  
181 (slope=0.88,  $r^2=0.76$ ), especially after removing three mismatched Dinophyta species  
182 (slope=0.97,  $r^2=0.97$ ), followed by V4F/V4RB (slope=0.79,  $r^2=0.87$ ) and V4F/V4R  
183 (slope=0.67,  $r^2=0.65$ ) (Fig. 4).

184

### 185 **Estimation of PCR and sequencing bias against 18S reads in mixed mock** 186 **communities**

187 To test for length-based PCR bias against 18S reads, 18S mock communities were  
188 mixed with 16S mock communities in equimolar amounts prior to PCR amplification.



189 The mixed mock communities were then PCR amplified, products analyzed on a Agilent  
190 2100 Bioanalyzer, and then sequenced (Fig. 1). The bioanalyzer is a electrophoretic  
191 instrument that accounts for differences in sequence length in estimating the molarity  
192 (i.e., copies of DNA per unit volume) for DNA inputs. Based on bioanalyzer traces that  
193 separately quantify the abundance of 16S and 18S amplicons, there was little systematic  
194 PCR bias (about 0.7-1.3-fold) against 18S PCR products when using the 18S even mock  
195 communities that have no primer mismatches to 515Y/926R (Fig 5, orange and blue  
196 dots, x axis only). When the 18S staggered mocks were included (with three Dinophyta  
197 species that have one mismatch to the reverse primer, 926R), there was considerably  
198 more PCR bias, up to 3-fold (Fig 6 green and purple dots, x axis only). The mixed  
199 amplicons were then sequenced and split into 16S and 18S reads pools by an *in silico*  
200 sorting step. By comparing ratios in the bioanalyzer outputs and the raw read counts  
201 after *in silico* sorting, we observed that there was typically a 2-fold sequencing  
202 discrimination against 18S reads (Fig. 5), which is consistent regardless of community  
203 types (even, staggered) and sequencing runs.

204

### 205 **The application of the 515Y/926R primer pair to field samples**

206 To examine the application of universal primers (515Y/926R) to natural  
207 samples, surface seawater samples from a larger size fraction (1.2-80  $\mu\text{m}$ ) collected  
208 from the San Pedro Ocean Time-series (SPOT) location in 2014 were analyzed. On  
209 average, 9% of reads were 18S, 17% of reads were plastidal 16S reads, i.e. chloroplasts  
210 in photosynthetic eukaryotes (excluding dinoflagellates whose chloroplasts are not  
211 detected, Needham and Fuhrman (2016)), and 74% of reads were prokaryotic 16S (Fig.  
212 6). A total of 2394 ASVs were identified across all samples (540 18S ASVs were affiliated  
213 to 228 orders; 442 plastidal 16S ASVs were affiliated to 81 orders; 1412 prokaryotic

214 16S ASVs were classified into 85 orders). Since Metazoa in this size fraction were patchy  
215 (maximum of 2% reads), mainly dominated by copepods Maxillopoda (Fig. 7a), they  
216 were separately analyzed in the community composition of 18S reads (Fig. 7b). 18S  
217 reads were dominated by Dinophyceae, Spirotrichea, Syndiniales, Ciliophora,  
218 Mamiellophyceae, MAST, Bacillariophyta, RAD-B, Prymnesiophyceae, and Polycystinea  
219 (Fig. 7b). For plastidal 16S reads, phytoplankton communities were dominated by  
220 Prymnesiophyceae, Mamiellophyceae, Pelagophyceae, Dictyochophyceae,  
221 Bacillariophyta, Cryptophyceae, Chrysophyceae-Synurophyceae, Raphidophyceae,  
222 Prasinophyceae, Bolidophyceae, and Chrysophyceae (Fig. 7c). The prokaryotic 16S  
223 reads showed that prokaryotic communities were mainly dominated by SAR11,  
224 Synechococcales (i.e. Cyanobacteria), Flavobacteriales, Rhodobacterales,  
225 Actinomarinales, Verrucomicrobiales, Puniceispirillales, Rhodospirillales, Opitutales,  
226 and Cellvibrionales. (Fig. 7d). The phytoplankton and prokaryotic communities had  
227 similar seasonal patterns, whereas non-phytoplankton eukaryotic communities were  
228 less predictable.

229

## 230 **Discussion**

231 This study shows that the 3-domain universal primer (515Y/926R) can resolve  
232 community composition quantitatively for 16S and 18S rRNA in a single PCR reaction,  
233 with biases we could quantify and manage. We were able to investigate the biases  
234 relevant to the use of these primers in a natural setting through the use of 18S mock  
235 communities first applied here, separately and in concert with 16S mocks.

236 Unlike 16S rRNA sequencing, 18S rRNA sequencing using 515Y/926R is  
237 bioinformatically challenging because the amplicon is too long (~575-595 bp) for  
238 forward and reverse reads to overlap with current Illumina sequencing capacities. A

239 simplified solution in such a situation might be to use forward reads only instead of  
240 merged paired-end reads, because the quality of reverse reads is generally worse than  
241 forward reads, and errors near the 3' end cannot be corrected without overlapping  
242 paired-end reads. However, using only forward reads sacrifices phylogenetic resolution.  
243 Therefore, acquiring paired-end information without producing extra artifacts becomes  
244 critical for 18S rRNA processing. To do so, we developed a bioinformatic workflow  
245 which allowed us to split mixed 16S/18S amplicons into two sequence pools by  
246 mapping reads to a curated 16S/18S reference database derived from SILVA and PR2.  
247 The workflow was validated with mixed mock communities, showing that the *in silico*  
248 sorting step is able to successfully separate 16S and 18S mocks apart without changing  
249 their composition. We analyzed 18S mock communities by trimming reads to fixed  
250 lengths before denoising. In this way, we not only removed error bases but also kept  
251 18S ASVs comparable between runs. Our analysis showed that we were able to recover  
252 18S mock communities as expected even when the trim length of reverse reads was  
253 reduced to 100 bp, implying that this analytical strategy can be used even for poor-  
254 quality sequences (as we sometimes see).

255         While analyzing the quantitative recovery of our mock communities and  
256 comparing 515Y/926R with other commonly-used 18S specific primers, we found a 3-8  
257 fold underestimation when there was an internal primer mismatch, as was the case with  
258 three Dinophyta included in our 18S mock community with mismatches to the reverse  
259 primer 926R. The same issue was previously found with the original EMP primers  
260 (515C/806R, V4) that underestimated SAR11 by 8-fold (Apprill et al., 2015) and  
261 Thaumarchaea by 1.5-3 fold (Parada et al., 2016). Consistent with our findings, Bru et al.  
262 (2008) found that underestimation generally increased as mismatches were closer to  
263 the 3' end of the primer, yet there was no predictable relationship between the position

264 of mismatch and the degree of underestimation. The worst mismatches are at the 3' end  
265 itself, as occurs with the V4R primer (Stoeck et al., 2010) for many common  
266 Haptophytes. This observation was the rationale for the creation of the V4RB primer  
267 with a 3' degeneracy (Balzano et al., 2015) that greatly improves recovery of  
268 haptophytes that are often dominant in seawater (Berdjeb et al., 2018).

269 For sequences that matched the primers exactly, we found that the 515Y/926R  
270 primers quantitatively recovered the mock communities abundances for both 16S and  
271 18S mocks ( $r^2 = 0.97$  for staggered mocks, observed vs. expected, Fig 3 and 4),  
272 indicating little preferential amplification of taxa that perfectly match primers.  
273 However, this did not apply to V4F/V4RB - although these primers perfectly matched all  
274 the clone members in the mock communities, they overestimated haptophytes by 3-4  
275 fold. This discrepancy between results probably relates to methodological differences.  
276 V4RB has a considerably lower annealing temperature than V4F and a 2-step PCR is  
277 required (Stoeck et al., 2010). In contrast, amplification with the 515Y/926R primers  
278 can be done in a single step PCR reaction. This methodological difference may explain  
279 why the 515Y/926R primers more accurately recovered relative abundances of 18S  
280 taxa that have no mismatches versus the V4F/V4RB primers. These findings, together  
281 with the results of Parada et al. (2016), indicate that the 515Y/926R primers recover  
282 both 16S and 18S mock communities quantitatively when examined separately.

283 Since amplicon lengths of 16S and 18S rRNA gene are different, simultaneous  
284 amplification of 16S and 18S rRNA genes can lead to a length-based discrimination  
285 during PCR and sequencing stages, similar to what was previously reported to occur in  
286 general (Kittelmann et al., 2013). We endeavored to develop a quantitative  
287 understanding of the bias to better interpret results and to determine ideal sequencing  
288 depth for mixed communities. We therefore created mixed mock communities

289 consisting of both 16S and 18S rRNA in equal molarity, amplified with 515Y/926R, and  
290 sequenced the resulting amplicons. The relative proportions of 16S and 18S amplicons  
291 were quantified using a bioanalyzer to evaluate PCR bias, and the number of recovered  
292 sequence reads were similarly counted (after splitting into 16S/18S pools in the  
293 bioinformatic pipeline) to determine the cumulative bias (both PCR and sequencing  
294 biases). We found very little PCR bias in even mocks that had no mismatches to the  
295 primers. As expected, the biases were 1.5-3-fold higher when samples included 18S  
296 staggered mock communities which contain three Dinophyta species that have one  
297 mismatch to the reverse primer. Moreover, a 2-fold sequencing bias (in addition to the  
298 aforementioned PCR biases) occurred in all combinations of mock community types.  
299 That suggests sequencing bias due to length differences is a consistent property of the  
300 Illumina sequencing platform, yet PCR bias due to primer mismatches is much less  
301 predictable. Thus, an evaluation of primer coverage across three domains, in actual field  
302 samples, may help better account for the PCR bias. Parada et al. (2016) found that  
303 515Y/926R perfectly matches 86% of eukaryotes, 87.9% of bacteria, and 83.9% of  
304 archaea in the SILVA database, but we note that in actual practice the extent of  
305 mismatches in field samples depends on the particular taxa present and their  
306 proportions. We should also note that our 18S mock communities are very rich in  
307 alveolates such as dinoflagellates (3 of 10 in even, 7 of 16 in staggered) that tend to have  
308 mismatches to the 515F/926F primers; hence they probably overestimate the biases  
309 expected in most field samples.

310       Regarding pipeline recommendations, we found that all three pipelines (qiime2  
311 q2-deblur plugin, qiime2 q2-dada2 plugin, and the standalone DADA2 R package) were  
312 capable of recovering our mock communities exactly, although we note several  
313 potential tradeoffs between the two algorithms we tested (deblur and DADA2) that

314 should be considered. Both DADA2 and Deblur can accurately recover the mocks under  
315 most conditions. However, we found DADA2 sometimes generated 1-mismatches to  
316 reference sequences when challenged with noisy sequence data (data not shown) or  
317 sequencing runs where PCR amplification used inconsistent methodological parameters  
318 (e.g. differing PCR cycles or input concentrations). These results reinforce the  
319 advisability of running some sort of control to account for PCR errors or run-to-run  
320 variability (mocks or duplicate samples spread across runs, see also Yeh et al. (2018)).

321         Although our work shows that DADA2 has the potential to generate false  
322 positives, we also note potential drawbacks to deblur. While deblur never produced 1-  
323 mismatches to the mock reference sequences, it removed a much larger fraction of total  
324 input sequences (~75%). This greatly reduces the sequencing yield, meaning that more  
325 sequencing is needed for the same coverage. In addition, the deblur algorithm differs  
326 significantly from DADA2 and there may be tradeoffs inherent in its design that are not  
327 apparent with the mocks. For example, deblur discards any reads deemed as errors  
328 whereas DADA2 attempts to correct sequencing errors (Callahan et al., 2016; Amir et al.,  
329 2017). Therefore, our evaluation with mock communities does not exclude the  
330 possibility that deblur may remove true biological variation deemed error sequences in  
331 natural samples where closely-related taxa coexist. Therefore, we recommend readers  
332 evaluate for themselves which denoiser is most appropriate for a given study, and  
333 consider the desired ultimate yield (of 16S and 18S sequences) when deciding  
334 sequencing depth.

335         To demonstrate the 515Y/926R full analytical pipeline with field samples, we  
336 analyzed monthly surface seawater samples collected from SPOT in 2014 from the 1.2-  
337 80  $\mu\text{m}$  size fraction, which includes most protists, larger than average free-living  
338 prokaryotes and those attached to <80  $\mu\text{m}$  particles. Even though this size fraction is

339 enriched in protists (free living bacteria which are mostly < 1  $\mu\text{m}$  are excluded), we  
340 found that 18S reads contributed an average of only to 9% of total reads, while  
341 chloroplasts averaged 17% and prokaryotes 74%. This proportion of 18S is similar to  
342 those reported from Southern California waters near SPOT (Needham and Fuhrman,  
343 2016; Parada et al., 2016; Needham et al., 2018), but due to new results reported here  
344 we now know the 18S has a sequencing bias that underestimates in their copy number  
345 ~2-fold. And while quantitative interpretation of 18S copy numbers is greatly  
346 complicated by the wide range of copies per genome (2 in some picoeukaryotes to  
347 >50,000 in some dinoflagellates and others, Zhu et al. (2005), the 16S of chloroplasts  
348 has a relatively smaller copy number variation and for phytoplankton the 16S plastid  
349 data probably more closely reflects relative biomass, e.g. chloroplast count, than does  
350 18S (Needham and Fuhrman, 2016), though dinoflagellate chloroplasts are missed. The  
351 assay even detects the presence of multiple metazoa, in our case including copepods  
352 and larvaceans, the latter of which are voracious bacterivores. However, since these are  
353 relatively large individuals that may be patchily represented in samples, we  
354 bioinformatically separated them and recalculated proportions of protists alone (Fig.  
355 7b).

356 Overall, this universal 515Y/926R primer pair is able to simultaneously examine  
357 the whole community structure across three domains, and we now have quantified the  
358 extent of sequencing biases that can be expected. This will allow us to better estimate  
359 cell abundances, biomasses, and overall inventories of all microbial (perhaps even some  
360 metazoa) taxa in a sample, and will facilitate improved interpretation of interactions,  
361 such as predation, parasitism, and mutualism. Although we now have quantified the  
362 biases associated with primer mismatch (e.g. the underestimation of some Dinophyta  
363 groups), the extent of underestimation is still unpredictable. Additionally, some protists

364 groups (Diplonemea, Kinetoplastida, and Discosea) are known to have particularly long  
365 V4 regions (up to 800 bp) that are likely missed or seriously underestimated due to the  
366 amplification biases (R. Massana pers. Comm.). Thus, the potential limitations of  
367 interpretation of 18S results from this primer set, and probably any other primer set for  
368 a similar purpose, should be recognized when attempting to comprehensively analyze  
369 community composition.

370

## 371 **Materials and methods**

### 372 Mock community preparation

373 To generate even and staggered 16S mock communities, 11 and 27 clones of  
374 marine 16S rRNA genes were respectively prepared as previously described (Parada et  
375 al., 2016; Yeh et al., 2018). In the even 16S mock community, 11 clones were mixed with  
376 equal molarity. For the staggered 16S mock community, 27 clones were mixed with  
377 varying concentrations to roughly mimic marine prokaryote community composition  
378 observed at our sampling site.

379 To create even and staggered 18S mock communities, nearly full-length 18S  
380 rRNA clone libraries were prepared from the large size fraction (1.2-80  $\mu\text{m}$ ) of seawater  
381 samples collected from SPOT location. DNA was amplified using universal eukaryote  
382 primers Euk-A (5'-AACCTGGTTGATCCTGCCAGT-3') and Euk-B (5'-  
383 GATCCTTCTGCAGGTTACCTAC-3') (Countway et al., 2005). 25- $\mu\text{l}$  PCR mixtures  
384 contained 1.25X 5Prime Hot master mix (0.5 U Taq, 45mM KCl, 2.5 mM Mg<sup>2+</sup>, 200  $\mu\text{M}$   
385 dNTPs; Quanta Bio), 0.5  $\mu\text{M}$  primers, and 1 ng of DNA. PCR conditions were performed  
386 as follows: an initial hot start step at 95°C for 2 min followed by 25 cycles of 95°C for 30  
387 sec, 50°C for 30 sec and 68°C for 4 min. PCR products were then cloned using TOPO TA  
388 cloning kit with pCR4-TOPO Vector and One Shot Top 10 competent cells according to



389 the manufacturer's protocols. The cloned PCR products were sequenced using Sanger  
390 sequencing. Species identification was confirmed using BLASTn against the nt database.  
391 16 clones were chosen to represent the major marine eukaryotic groups, including  
392 haptophytes, dinoflagellates, diatoms, ciliates, cercozoa, radiolaria, and copepods.  
393 Plasmids were purified using Qiagen plasmid plus 96 miniprep kit and then amplified  
394 with Euk-A and Euk-B using the same conditions described above. In the even 18S mock  
395 community, 10 clones were mixed with equal molarity. In the staggered 18S mock  
396 community, 16 clones were mixed with different concentrations. To mimic natural  
397 marine communities consisting of both eukaryotes and prokaryotes, 16S and 18S mock  
398 communities were mixed in four combinations (Fig. 1). Each mixed mock community  
399 was pooled with equal molarity after taking lengths into account (the average length of  
400 16S mocks is 1425 bp, and the average length of 18S mocks is 1770 bp).

401

#### 402 Sample collection and DNA extraction

403 Samples were collected from 5m depth at San Pedro Ocean Time-series (SPOT)  
404 location in 2014. Approximately 12 L of seawater was sequentially filtered through 80-  
405  $\mu\text{m}$  mesh, a 1.2- $\mu\text{m}$  A/E filter (Pall, Port Washington, NY), and a 0.2- $\mu\text{m}$  Durapore filter  
406 (ED Millipore, Billerica, MA). Filters were stored at  $-80^{\circ}\text{C}$  until DNA extraction. This  
407 study only used DNA extracted from A/E filters (1.2-80  $\mu\text{m}$ ), which consist of both  
408 eukaryotic microbes and prokaryotes, for primer and pipeline testing purposes. DNA  
409 was extracted from A/E filters using a NaCl/CTAB bead-beating extraction protocol as  
410 described by Lie et al. (2013) with slight modification by adding an ethanol  
411 precipitation step after lysis to reduce the volume of crude extract, which helps  
412 minimize DNA loss during the subsequent purification.

413

414 PCR and sequencing

415 To compare 16S/18S universal primers with eukaryote-specific primers, 18S  
416 mock communities were amplified with V4F (5'-CCAGCASCYGGGTAATTCC-3') and V4R  
417 (5'-ACTTTCGTTCTTGATYRA-3'), and V4F and V4RB (5'-ACTTTCGTTCTTGATYRR-3')  
418 (Stoeck et al., 2010; Balzano et al., 2015). The only difference between these two primer  
419 pairs is the last nucleotide on the 3' end of the reverse primer (A to R), which makes  
420 V4F/V4RB amplify haptophytes better (Balzano et al., 2015). Due to the considerably  
421 lower annealing temperature of the reverse primer, the full primers with indices and  
422 Illumina adaptors did not result in any PCR bands. Thus, 2-step PCR was required to  
423 obtain efficient amplification as is standard practice for this primer set (Stoeck et al.,  
424 2010; Balzano et al., 2015; Mahé et al., 2015; Pasulka et al., 2016). The first PCR  
425 mixtures contained 1X Phusion HF buffer (1.5 mM MgCl<sub>2</sub>), 300 µM dNTPs, 0.5 µM  
426 primers, 3% DMSO, 0.5 U Phusion High-Fidelity DNA polymerase (New England BioLabs  
427 Inc.), and 1 pg pure mock community. PCR cycles were as follows: 98°C for 1 min, 10  
428 cycles of 98°C for 30 sec, 53°C for 30 sec, 72°C for 30 sec; and then 15 cycles of 98°C for  
429 30 sec, 48°C for 30 sec, 72°C for 30 sec, and a final extension step of 72°C for 10 min.  
430 The second PCR reaction was performed with full primers that had barcoded indices  
431 and Illumina adaptors. PCR mixtures contained 1X Phusion HF buffer (1.5 mM MgCl<sub>2</sub>),  
432 300 µM dNTPs, 0.5 µM primers, 3% DMSO, 0.5 U Phusion High-Fidelity DNA polymerase  
433 (New England BioLabs Inc.), and 2 µl of the PCR products from the first step. PCR cycles  
434 were as follows: 98°C for 1 min, 10 cycles of 98°C for 30 sec, 48°C for 30 sec, 72°C for 30  
435 sec, and a final extension step of 72°C for 10 min.

436 With 16S/18S universal primers (515Y, 5'-GTGYCAGCMGCCGCGGTAA-3'; 926R,  
437 5'-CCGYCAATTYMTTTRAGTTT-3'), as shown in Fig. 1, 8 different types of mock  
438 communities were amplified using single step PCR with full-length primers that had

439 barcoded indices and Illumina adaptors. 25- $\mu$ l PCR mixtures contained 1.25X 5Prime  
440 Hot master mix (0.5 U Taq, 45mM KCl, 2.5 mM Mg<sup>2+</sup>, 200  $\mu$ M dNTPs; Quanta Bio), 0.3  
441  $\mu$ M primers, and 1 pg of pure mock community. PCR conditions were as follows: 95°C  
442 for 2 min, 30 cycles of 95°C for 45 sec, 50°C for 45 sec and 68°C for 90 sec, and a final  
443 extension step of 68°C for 5 min. Environmental samples were amplified using the same  
444 condition described above but with 0.5 ng of DNA. PCR products were cleaned using  
445 0.8X Ampure XP magnetic beads (Beckman Coulter). Purified PCR products were  
446 quantified with PicoGreen and sequenced on Illumina HiSeq 2500 in PE250 mode and  
447 MiSeq PE300. For each sequencing run, multiple blanks (i.e. PCR negative controls)  
448 were included as internal controls, meaning PCR water was amplified, cleaned and  
449 sequenced as environmental samples with the same conditions described above. After  
450 sequence processing, blanks were used to check for contamination that comes from  
451 sample bleed-through due to “index hopping”.

452

#### 453 Sequence demultiplexing

454 Sequences were demultiplexed by reverse indices allowing no mismatches using  
455 QIIME 1.9.1 `split_libraries_fastq.py` (Caporaso et al., 2010). Then, forward barcodes  
456 were extracted using QIIME 1.9.1 `extract_barcode.py`. The sequences were  
457 demultiplexed by forward barcodes allowing no mismatches using QIIME 1.9.1  
458 `split_libraries_fastq.py`. The fully demultiplexed forward and reverse sequences were  
459 then split into per-sample fastq files using QIIME 1.9.1  
460 `split_sequence_file_on_sample_ids.py`. The per-sample fastq files have been submitted to  
461 the EMBL database under accession number PRJEB35673.

462

#### 463 *In silico* processing of amplicons

464           Scripts necessary to reproduce the following analysis are available at  
465 [github.com/jcmcnch/eASV-pipeline-for-515Y-926R](https://github.com/jcmcnch/eASV-pipeline-for-515Y-926R). Demultiplexed amplicon sequences  
466 were trimmed with cutadapt, discarding any sequence pairs not containing the forward  
467 or reverse primer. We allowed an error rate of up to 20% to retain amplicons with  
468 mismatches to the primer. Mixed amplicon sequences were then split into 16S and 18S  
469 pools using `bbsplit.sh` from the `bbtools` package  
470 (<http://sourceforge.net/projects/bbmap/>) against curated 16S/18S databases derived  
471 from SILVA 132 (Quast et al., 2013) and PR2 (Guillou et al., 2013). The splitting  
472 databases used are available at <https://osf.io/e65rs/>. The two amplicon categories  
473 were then analyzed in parallel using qiime2 (Bolyen et al., 2019) or DADA2  
474 implemented as the standalone R package (Callahan et al., 2016) as described below.

475

476 16S processing

477           16S sequences were analyzed using the DADA2 R package (Callahan et al., 2016),  
478 the QIIME 2 `q2-dada2` plugin, and the QIIME 2 `q2-deblur` plugin (Amir et al., 2017) to  
479 compare different denoising outputs. We ran DADA2 in both R and qiime2 platforms to  
480 compare version differences (standalone R DADA2 = v1.10.1; qiime2-2018.8). With  
481 DADA2, forward and reverse reads were trimmed and filtered after inspecting their  
482 quality profiles. Filtered reads were used to make parametric error models for forward  
483 and reverse reads independently. Then, filtered reads were denoised based on run-  
484 specific error models. Denoised reads were then merged and remove chimeric reads.  
485 Note that the DADA2 R package allows us to exclude blanks from error model training,  
486 but qiime2 `q2-dada2` plugin does not have this capacity. With `deblur`, reads were  
487 merged with qiime2 `VSEARCH` and filtered using qiime2 `q-score-joined` plugin. Filtered  
488 reads were then processed through the qiime2 `q2-deblur` plugin. 16S ASVs were

489 classified with qiime2 classify-sklearn plugin against the SILVA 132 database subsetted  
490 to the amplicon region. 16S ASVs classified as Chloroplast were extracted based on the  
491 SILVA classifications and subsequently reclassified against the PhytoRef database.

492

493 18S processing

494 18S reads amplified with 515Y/926R are 575-595 bp, which is too long for  
495 forward and reverse reads to overlap, so we chose to trim reads to fixed lengths before  
496 the denoising step. While inspecting quality profiles, reverse reads were generally lower  
497 quality than forward reads and quality profiles varied among sequencing runs. To find  
498 trim lengths which worked equally well among runs, forward reads were trimmed to  
499 220 bp and reverse reads were trimmed to varying lengths (100-220 bp). With the  
500 DADA2 R package, trimmed forward and reverse reads were used to make parametric  
501 error models independently. Then, trimmed reads were denoised based on run-specific  
502 error models. Denoised reads were concatenated and chimeric reads were removed.  
503 With the QIIME 2 q2-dada2 and q2-deblur plugins (which did not have an option for  
504 independent denoising and subsequent merging at the time of writing), forward and  
505 reverse reads were trimmed using bbduk.sh and concatenated using fuse.sh from  
506 bbtools package (<http://sourceforge.net/projects/bbmap/>). Concatenated reads were  
507 then processed as artificial single-end reads and chimeras were removed using QIIME 2  
508 q2-dada2 and q2-deblur plugins. 18S ASVs were classified with qiime2 classify-sklearn  
509 plugin against both SILVA 132 and PR2 databases. Once processed into exact amplicon  
510 sequence variants (ASVs), 18S sequences were split into paired read files to indicate  
511 their non-overlapping nature.

512

513 Validation of ASV algorithms by analysis of mock communities

514 ASVs were Blastn against *in silico* mock sequences to determine ASVs that  
515 perfectly matched *in silico* sequences, artifacts (1-mismatch to the *in silico* sequences),  
516 or contamination (more than 1-mismatch to the *in silico* sequences). To compare the  
517 performance of each pipeline, we determined 1) the percent of reads that perfectly  
518 matched *in silico* sequences, 2) the percent of reads removed after denoising, and 3) the  
519 R-squared values of linear regression between observed and expected abundances on a  
520 log (x+0.001) scale. The processing scripts in this study are available on Figshare at  
521 <https://doi.org/10.6084/m9.figshare.11320388>

522

523 PCR and sequencing bias estimation

524 16S and 18S mixed mock communities amplified with 515Y/926R were run on a  
525 Agilent 2100 Bioanalyzer to quantify concentrations of 16S and 18S PCR products in  
526 each mixed mock community. Amplicons were analyzed with the High-sensitivity DNA  
527 assay kit according to the manufacturer's instructions. Due to the length differences  
528 between 16S and 18S amplicons, the concentration of each amplicons were measured  
529 by checking peak area on Agilent 2100 Bioanalyzer using manual integration without  
530 altering the instrument-determined baseline. The 16S:18S ratio of molarity was used to  
531 determine PCR bias. Sequence pre-processing (i.e. bbsplit.sh) split reads into 16S and  
532 18S pools. The 16S:18S ratio of the number reads was used to determine sequencing  
533 and PCR bias. The slope of the line derived from plotting the 16S:18S ratio from  
534 Bioanalyzer traces against 16S:18S ratio based on the number reads after the bbsplit  
535 step was used to define sequencing bias.

536

537 **Acknowledgments**

538 We thank Mike Lee for selflessly taking the time to think and blog about how to split 16S  
539 from 18S informatically, which inspired the bbsplit method in our qiime2 workflow. This  
540 work was supported by NSF OCE 1737409, Gordon and Betty Moore Foundation Marine  
541 Microbiology Initiative grant 3779, and Simons Foundation Collaboration on  
542 Computational Biogeochemical Modeling of Marine Ecosystems (CBIOMES) grant  
543 549943.

544

## 545 **References**

546 Amaral-Zettler, L.A., McCliment, E.A., Ducklow, H.W., and Huse, S.M. (2009) A method for  
547 studying protistan diversity using massively parallel sequencing of V9 hypervariable  
548 regions of small-subunit ribosomal RNA genes. *PloS one* **4**: e6372.

549 Amir, A., McDonald, D., Navas-Molina, J.A., Kopylova, E., Morton, J.T., Xu, Z.Z. et al. (2017)  
550 Deblur Rapidly Resolves Single-Nucleotide Community Sequence Patterns. *mSystems* **2**:  
551 e00191-00116.

552 Apprill, A., McNally, S., Parsons, R., and Weber, L. (2015) Minor revision to V4 region  
553 SSU rRNA 806R gene primer greatly increases detection of SAR11 bacterioplankton.  
554 *Aquatic Microbial Ecology* **75**: 129-137.

555 Balzano, S., Abs, E., and Leterme, S.C. (2015) Protist diversity along a salinity gradient in  
556 a coastal lagoon. *Aquatic Microbial Ecology* **74**: 263-277.

557 Berdjeb, L., Parada, A., Needham, D.M., and Fuhrman, J.A. (2018) Short-term dynamics  
558 and interactions of marine protist communities during the spring–summer transition.  
559 *The ISME journal* **12**: 1907.

560 Bolyen, E., Rideout, J.R., Dillon, M.R., Bokulich, N.A., Abnet, C., Al-Ghalith, G.A. et al.  
561 (2018) QIIME 2: Reproducible, interactive, scalable, and extensible microbiome data  
562 science. In: PeerJ Preprints.

563 Bradley, I.M., Pinto, A.J., and Guest, J.S. (2016) Design and evaluation of Illumina MiSeq-  
564 compatible, 18S rRNA gene-specific primers for improved characterization of mixed  
565 phototrophic communities. *Appl Environ Microbiol* **82**: 5878-5891.

566 Bru, D., Martin-Laurent, F., and Philippot, L. (2008) Quantification of the detrimental  
567 effect of a single primer-template mismatch by real-time PCR using the 16S rRNA gene  
568 as an example. *Appl Environ Microbiol* **74**: 1660-1663.

569 Callahan, B.J., McMurdie, P.J., Rosen, M.J., Han, A.W., Johnson, A.J.A., and Holmes, S.P.  
570 (2016) DADA2: high-resolution sample inference from Illumina amplicon data. *Nature*  
571 *methods* **13**: 581-583.

572 Chénard, C., Wijaya, W., Vaultot, D., dos Santos, A.L., Martin, P., Kaur, A., and Lauro, F.M.  
573 (2019) Temporal and spatial dynamics of Bacteria, Archaea and protists in equatorial  
574 coastal waters. *Scientific Reports* **9**: 1-13.

575 De Vargas, C., Audic, S., Henry, N., Decelle, J., Mahé, F., Logares, R. et al. (2015)  
576 Eukaryotic plankton diversity in the sunlit ocean. *Science* **348**: 1261605.

577 Del Campo, J., Pons, M.J., Herranz, M., Wakeman, K.C., Del Valle, J., Vermeij, M.J. et al.  
578 (2019) Validation of a universal set of primers to study animal-associated  
579 microeukaryotic communities. *Environmental microbiology* **21**: 3855-3861.

580 Eren, A.M., Morrison, H.G., Lescault, P.J., Reveillaud, J., Vineis, J.H., and Sogin, M.L. (2015)  
581 Minimum entropy decomposition: unsupervised oligotyping for sensitive partitioning of  
582 high-throughput marker gene sequences. *The ISME journal* **9**: 968-979.

583 Fuhrman, J.A., Cram, J.A., and Needham, D.M. (2015) Marine microbial community  
584 dynamics and their ecological interpretation. *Nature Reviews Microbiology* **13**: 133-146.

585 Lin, Y., Gifford, S., Ducklow, H., Schofield, O., and Cassar, N. (2019) Towards quantitative  
586 microbiome community profiling using internal standards. *Appl Environ Microbiol* **85**:  
587 e02634-02618.



588 Mahé, F., Mayor, J., Bunge, J., Chi, J., Siemensmeyer, T., Stoeck, T. et al. (2015) Comparing  
589 High-throughput Platforms for Sequencing the V4 Region of SSU-r DNA in  
590 Environmental Microbial Eukaryotic Diversity Surveys. *Journal of Eukaryotic*  
591 *Microbiology* **62**: 338-345.

592 Martin, M. (2011) Cutadapt removes adapter sequences from high-throughput  
593 sequencing reads. *EMBnet journal* **17**: 10-12.

594 Needham, D.M., and Fuhrman, J.A. (2016) Pronounced daily succession of  
595 phytoplankton, archaea and bacteria following a spring bloom. *Nature microbiology* **1**:  
596 16005.

597 Needham, D.M., Fichot, E.B., Wang, E., Berdjeb, L., Cram, J.A., Fichot, C.G., and Fuhrman,  
598 J.A. (2018) Dynamics and interactions of highly resolved marine plankton via automated  
599 high-frequency sampling. *The ISME journal* **12**: 2417.

600 Parada, A.E., Needham, D.M., and Fuhrman, J.A. (2016) Every base matters: assessing  
601 small subunit rRNA primers for marine microbiomes with mock communities, time  
602 series and global field samples. *Environmental microbiology* **18**: 1403-1414.

603 Pasulka, A.L., Levin, L.A., Steele, J.A., Case, D.H., Landry, M.R., and Orphan, V.J. (2016)  
604 Microbial eukaryotic distributions and diversity patterns in a deep-sea methane seep  
605 ecosystem. *Environmental microbiology* **18**: 3022-3043.

606 Sogin, M.L., Morrison, H.G., Huber, J.A., Welch, D.M., Huse, S.M., Neal, P.R. et al. (2006)  
607 Microbial diversity in the deep sea and the underexplored "rare biosphere". *Proceedings*  
608 *of the National Academy of Sciences* **103**: 12115-12120.

609 Stoeck, T., Bass, D., Nebel, M., Christen, R., Jones, M.D., Breiner, H.W., and Richards, T.A.  
610 (2010) Multiple marker parallel tag environmental DNA sequencing reveals a highly  
611 complex eukaryotic community in marine anoxic water. *Molecular ecology* **19**: 21-31.

612 Yeh, Y.-C., Needham, D.M., Sieradzki, E.T., and Fuhrman, J.A. (2018) Taxon  
613 Disappearance from Microbiome Analysis Reinforces the Value of Mock Communities as  
614 a Standard in Every Sequencing Run. *MSystems* **3**: e00023-00018.

Table 1. Effects of trim length on 18S staggered mock community

| Trim length of reverse reads (bp) | Deblur                                  |                             |                                       | DADA2 R package                         |                             |                                       | DADA2 QIIME 2 version                   |                             |                                       |
|-----------------------------------|-----------------------------------------|-----------------------------|---------------------------------------|-----------------------------------------|-----------------------------|---------------------------------------|-----------------------------------------|-----------------------------|---------------------------------------|
|                                   | Percent reads perfectly match in silico | $r^2$ expected vs. observed | Percent reads removed after denoising | Percent reads perfectly match in silico | $r^2$ expected vs. observed | Percent reads removed after denoising | Percent reads perfectly match in silico | $r^2$ expected vs. observed | Percent reads removed after denoising |
| 220                               | 100                                     | 0.77                        | 73.5                                  | 99.5                                    | 0.76                        | 35.8                                  | 99.4                                    | 0.77                        | 20.0                                  |
| 210                               | 100                                     | 0.77                        | 72.6                                  | 99.6                                    | 0.74                        | 31.2                                  | 99.4                                    | 0.77                        | 29.3                                  |
| 200                               | 100                                     | 0.77                        | 72.3                                  | 99.7                                    | 0.76                        | 28.3                                  | 99.5                                    | 0.77                        | 27.3                                  |
| 190                               | 100                                     | 0.77                        | 71.2                                  | 99.8                                    | 0.76                        | 25.8                                  | 99.6                                    | 0.77                        | 25.1                                  |
| 180                               | 100                                     | 0.77                        | 70.2                                  | 99.8                                    | 0.76                        | 24.3                                  | 99.6                                    | 0.77                        | 23.4                                  |
| 170                               | 100                                     | 0.76                        | 71.5                                  | 99.9                                    | 0.76                        | 23.3                                  | 99.7                                    | 0.76                        | 22.4                                  |
| 160                               | 100                                     | 0.76                        | 70.4                                  | 99.9                                    | 0.76                        | 22.5                                  | 99.6                                    | 0.76                        | 21.6                                  |
| 150                               | 100                                     | 0.76                        | 69.3                                  | 99.9                                    | 0.76                        | 21.7                                  | 99.7                                    | 0.76                        | 20.7                                  |
| 140                               | 100                                     | 0.76                        | 70.2                                  | 99.9                                    | 0.76                        | 20.9                                  | 99.8                                    | 0.76                        | 19.5                                  |
| 130                               | 100                                     | 0.76                        | 69.2                                  | 100.0                                   | 0.76                        | 20.4                                  | 99.9                                    | 0.76                        | 18.9                                  |
| 120                               | 100                                     | 0.76                        | 68.3                                  | 100.0                                   | 0.76                        | 19.8                                  | 99.8                                    | 0.76                        | 18.1                                  |
| 110                               | 100                                     | 0.76                        | 67.4                                  | 100.0                                   | 0.76                        | 19.3                                  | 99.8                                    | 0.76                        | 17.6                                  |
| 100                               | 100                                     | 0.76                        | 66.4                                  | 100.0                                   | 0.76                        | 18.8                                  | 99.9                                    | 0.76                        | 16.9                                  |

616 Figure 1. Experimental design. 8 mock communities were amplified using the  
 617 515Y/926R primers. The amplicons of mixed mock communities were analyzed using a  
 618 Bioanalyzer to quantify the PCR bias against 18S amplicons. After sequencing, 16S and  
 619 18S reads were then separated through an *in-silico* sorting step and the number of 16S  
 620 and 18S reads counted to quantify the sequencing bias against 18S. Hypothetically, if  
 621 there is no bias, all the mixed mocks are located at a single point (1,1). If there is only  
 622 PCR bias, all the data points will be at the one-to-one line. If there are PCR and  
 623 sequencing bias, all the data points will be located above the one-to-one line (gray area).  
 624 The slope indicates the sequencing bias.

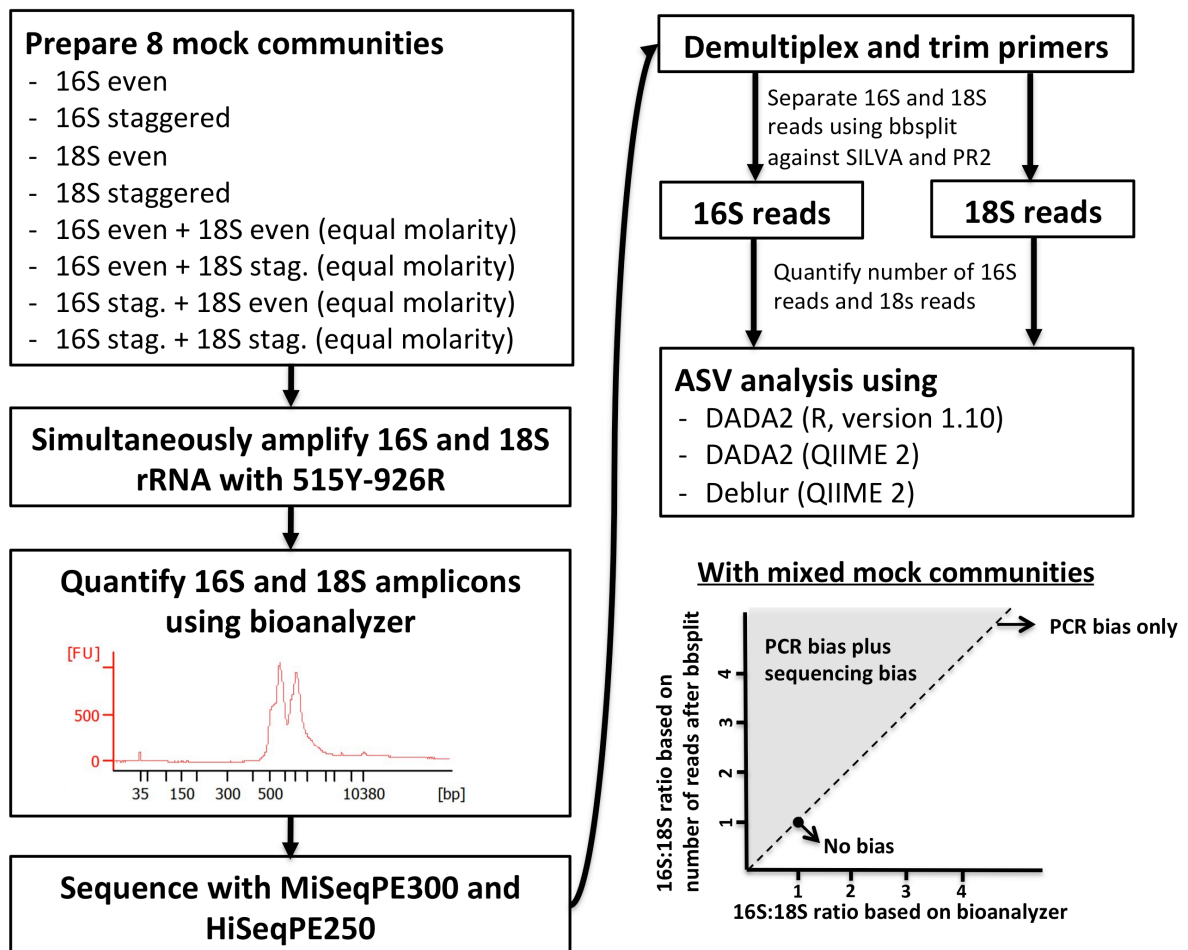

625

626 Figure 2. Comparison of even 18S mock communities amplified with V4F/V4R (a),  
 627 V4F/V4RB (b), and 515Y/926R (c).

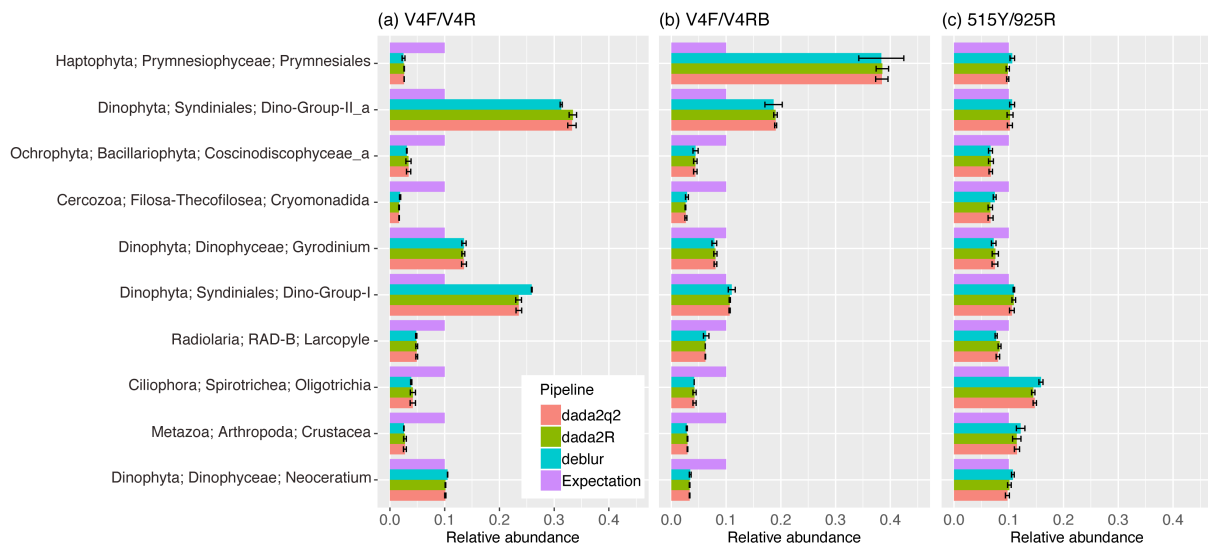

629 Figure 3. Comparison of staggered 18S mock communities amplified with V4F/V4R (b),  
 630 V4F/V4RB (b), and 515Y/926R (c). The insert in (c) shows only taxa with perfect  
 631 matches.

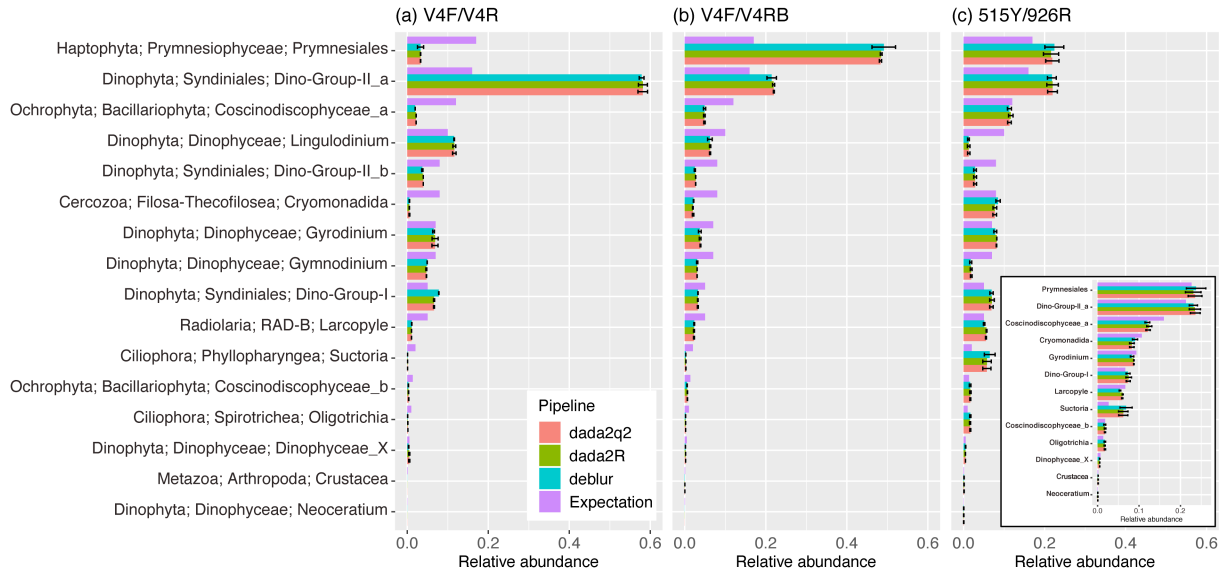

632  
 633

634 Figure 4. Expected staggered 18S mock communities plotted against observed  
635 staggered 18S mock communities amplified with different primers pairs (a) and without  
636 clone members that have mismatches on the given primer pairs (b).

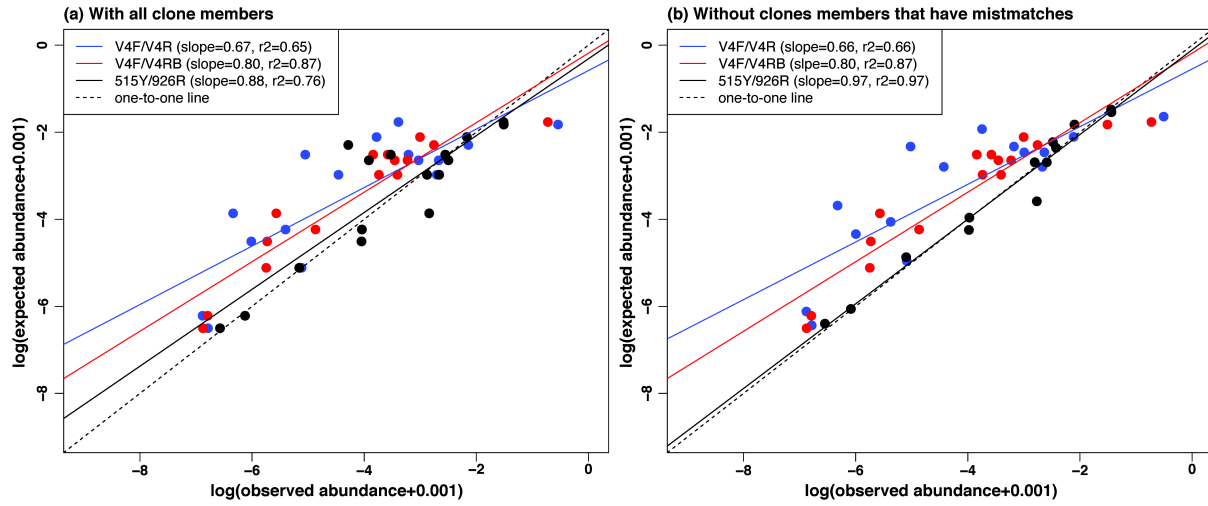

638 Figure 5. Comparison of PCR and sequencing biases among four mixed 16S and 18S  
639 mock communities, each combined in 1:1 molar ratios. The X axis shows ratios in the  
640 PCR products, and the Y axis shows the ratios in the final sequences, including biases  
641 from PCR plus sequencing. The data points all occur above the dashed 1:1 line,  
642 indicating most biases are from sequencing. Note for 18S even mocks (orange and blue)  
643 the PCR products have a bioanalyzer output ratio near 1, indicating little PCR bias. The  
644 staggered 18S mocks (green and purple) include 3 members with primer-template  
645 mismatches and correspondingly more PCR bias visible on the x axis. In all cases the  
646 final reads show about 2-fold more bias than the PCR biases alone.

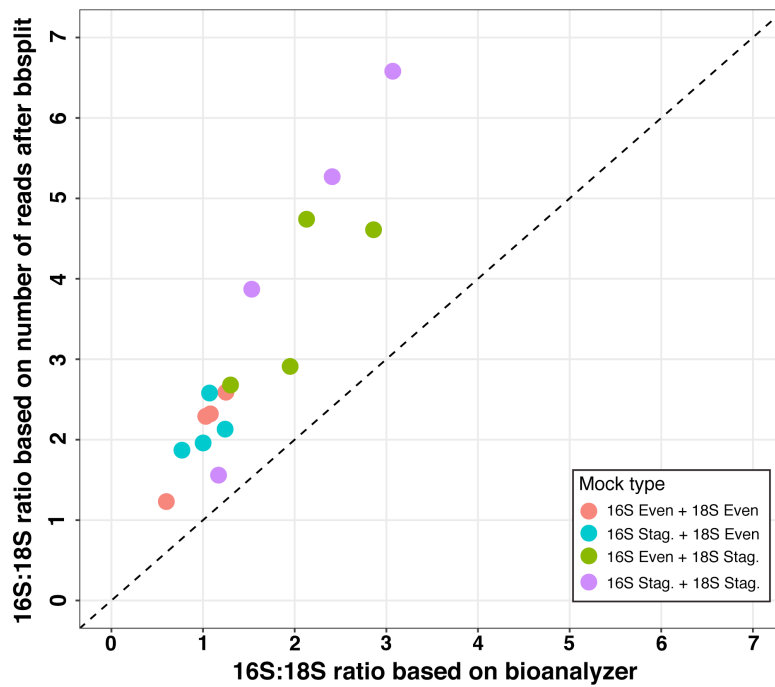

647



648 Figure 6. The composition of reads found in 1.2-80  $\mu\text{m}$  size fraction of seawater samples  
649 collected from SPOT in 2014. Numbers on the X axis are months.

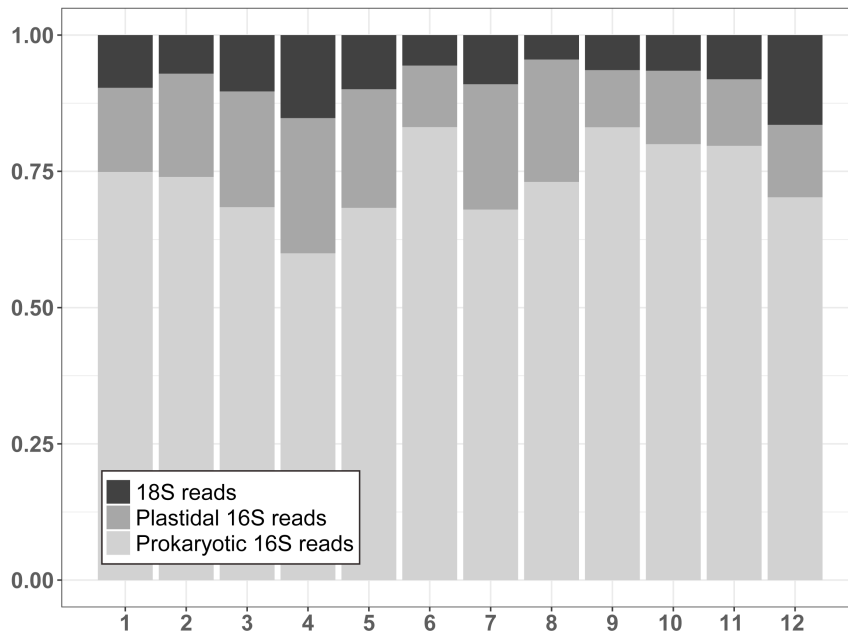

650

651 Figure 7. The monthly community composition of 1.2-80  $\mu\text{m}$  size fraction of seawater  
 652 samples collected from SPOT in 2014 at class level for eukaryotes and at order level for  
 653 prokaryotes. Only the dominant ASVs (the average relative abundance is greater than  
 654 0.5%) were shown. Each box represents single ASV.

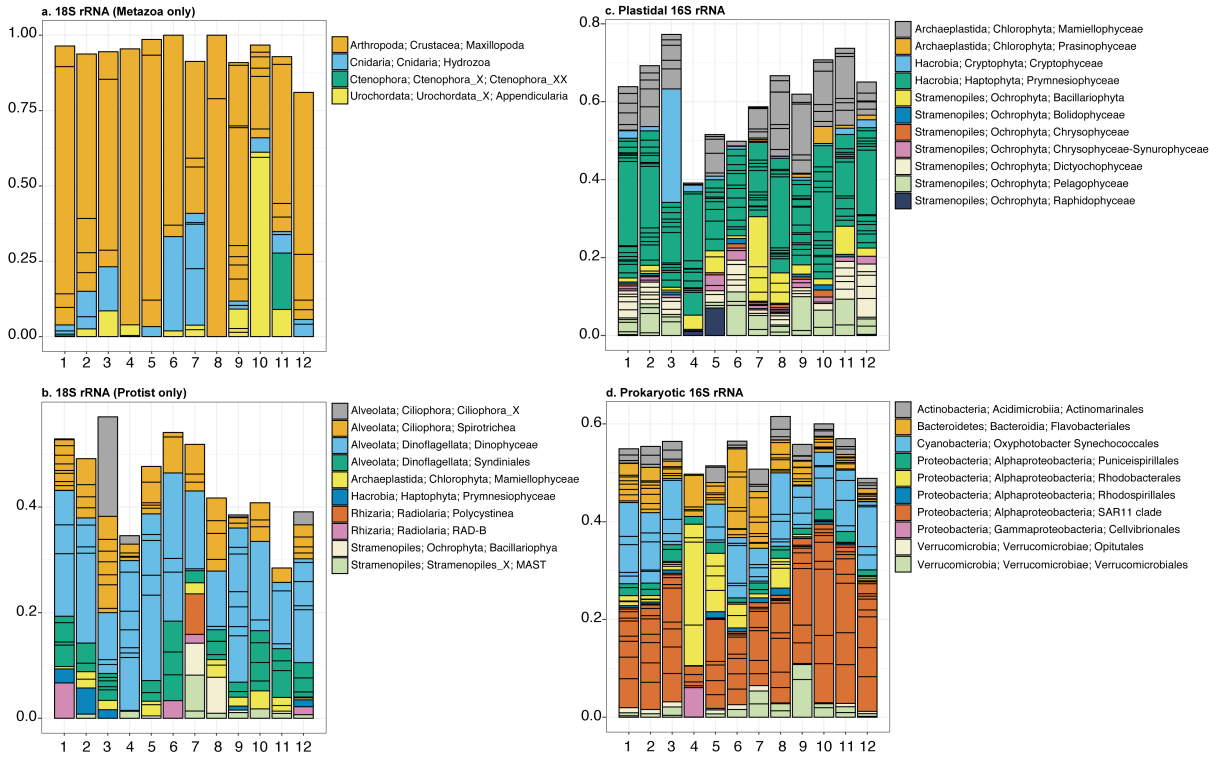

655
